# Supplementary material for: Development of a Prognostic Model of Overall Survival for Metastatic Hormone-Naïve Prostate Cancer in Japanese Men
Source: Cancers (Basel). 2022 Oct 2;14(19):4822. doi: 10.3390/cancers14194822 (PMC9563582; doi:10.3390/cancers14194822)
Supplement: Supplementary file 1 [file cancers-14-04822-s001.zip › cancers-1888496-supplementary.pdf]

**Table S1. Univariate and multivariable analysis of prognostic factors for cancer specific survival**

| Variables                       | Univariate |      |       |       | Multivariable |       |       |       |
|---------------------------------|------------|------|-------|-------|---------------|-------|-------|-------|
|                                 | 95% CI     |      |       |       | 95% CI        |       |       |       |
|                                 | p value    | HR   | Lower | Upper | p value       | HR    | Lower | Upper |
| Age <70 vs. $\geq 70$ (years)   | 0.93       | 0.98 | 0.61  | 1.57  | 0.46          | 1.40  | 0.58  | 3.38  |
| Include GS5                     | <0.001     | 3.29 | 1.95  | 5.57  | 0.066         | 2.57  | 0.94  | 7.03  |
| PSA <200 vs. $\geq 200$ (ng/mL) | 0.38       | 1.23 | 0.77  | 1.95  | 0.96          | 0.97  | 0.28  | 3.41  |
| BSI <1.5 vs. $\geq 1.5$         | 0.14       | 1.61 | 0.86  | 3.04  | 0.18          | 2.20  | 0.69  | 7.01  |
| Visceral metastasis             | 0.51       | 1.22 | 0.68  | 2.20  | 0.092         | 0.19  | 0.027 | 1.31  |
| CRP <1.0 vs. $\geq 1.0$ (mg/dL) | 0.94       | 1.03 | 0.52  | 2.02  | 0.35          | 0.58  | 0.19  | 1.80  |
| NLR <2.5 vs. $\geq 2.5$         | 0.32       | 1.42 | 0.71  | 2.82  | 0.16          | 2.04  | 0.76  | 5.53  |
| Hb <12 vs. $\geq 12$ (g/dL)     | 0.86       | 1.07 | 0.51  | 2.24  | 0.65          | 0.77  | 0.25  | 2.38  |
| ALP <300 vs. $\geq 300$ (IU/L)  | 0.33       | 1.36 | 0.73  | 2.53  | 0.13          | 0.40  | 0.12  | 1.33  |
| LDH <300 vs. $\geq 300$ (IU/L)  | <0.001     | 7.82 | 3.71  | 16.48 | 0.002         | 10.14 | 2.36  | 43.61 |

GP5 and LDH  $\geq 300$  were risk factors in univariate analysis. On the other hand, BSI  $\geq 1.5$  was not a risk factor. Multivariate analysis for CSS showed that only LDH  $\geq 300$  was an independent risk factor.

PSA; Prostate specific antigen, GP; Gleason Pattern, BSI; Bone scan index, CRP; C-reactive protein, NLR; Neutrophil-to-lymphocyte ratio, Hb; Hemoglobin, ALP; Alkaline phosphatase, LDH; Lactate dehydrogenase

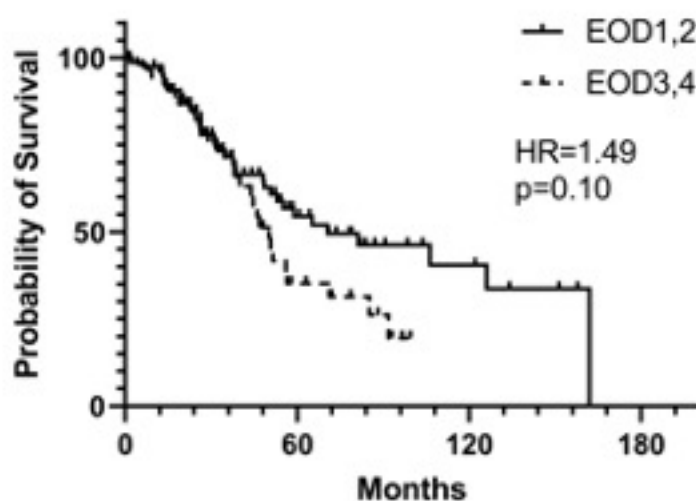

|          | Median OS | Numbers at risk |    |   |
|----------|-----------|-----------------|----|---|
| EOD 1, 2 | 70.57     | 79              | 24 | 7 |
| EOD 3, 4 | 50.17     | 53              | 10 | 0 |

**Figure S1.** Kaplan-Meier showing the difference in OS stratified by low EOD score (score 1,2) and high EOD score (score 3,4).

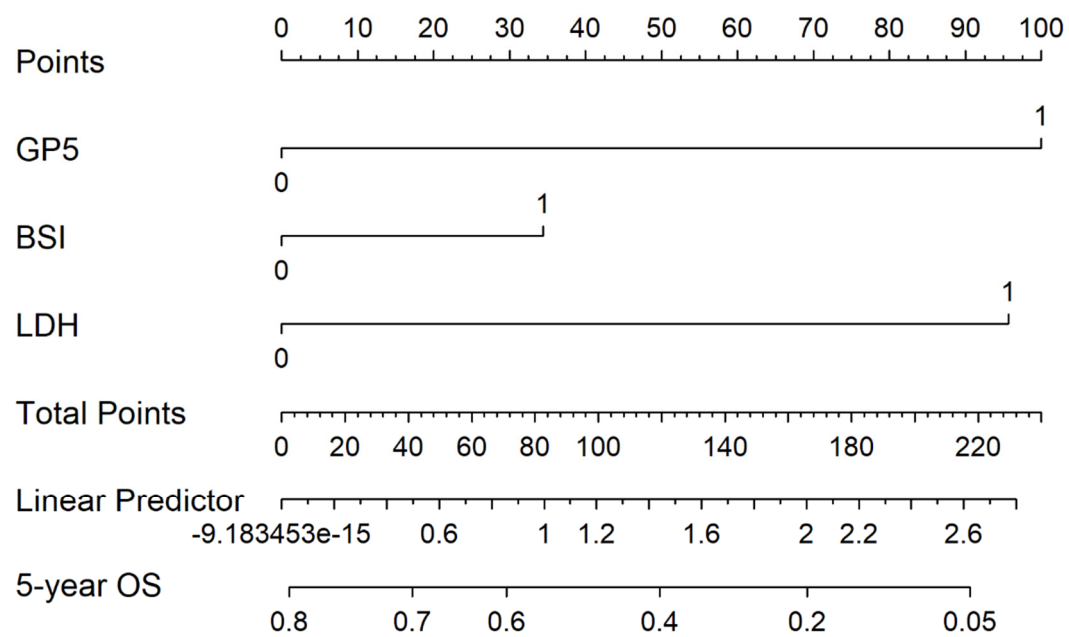

**Figure S2.** A nomogram was developed that combined the significant independent clinical variables.
